# Supplementary material for: LPS Guides Distinct Patterns of Training and Tolerance in Mast Cells
Source: PubMed Central journal article supplement (PMC8891506; doi:10.3389/fimmu.2022.835348), 2022-02-17

## Supplemental Material

### S1. Level of cytokines released after 24 h by a single stimulation

TNF- $\alpha$  (A) and IL-6 (B) levels were detected in culture supernatants of BMMC stimulated for 24 hours with LPS (1mg/ml), curdlan (100mg/ml), IgE/Ag or left un-treated (RPMI). N=3; statistical analysis were performed with one-way Anova with Dunnet correction (\*= $p < 0,05$  \*\*= $p < 0,01$ ; \*\*\*= $p < 0,001$ ).

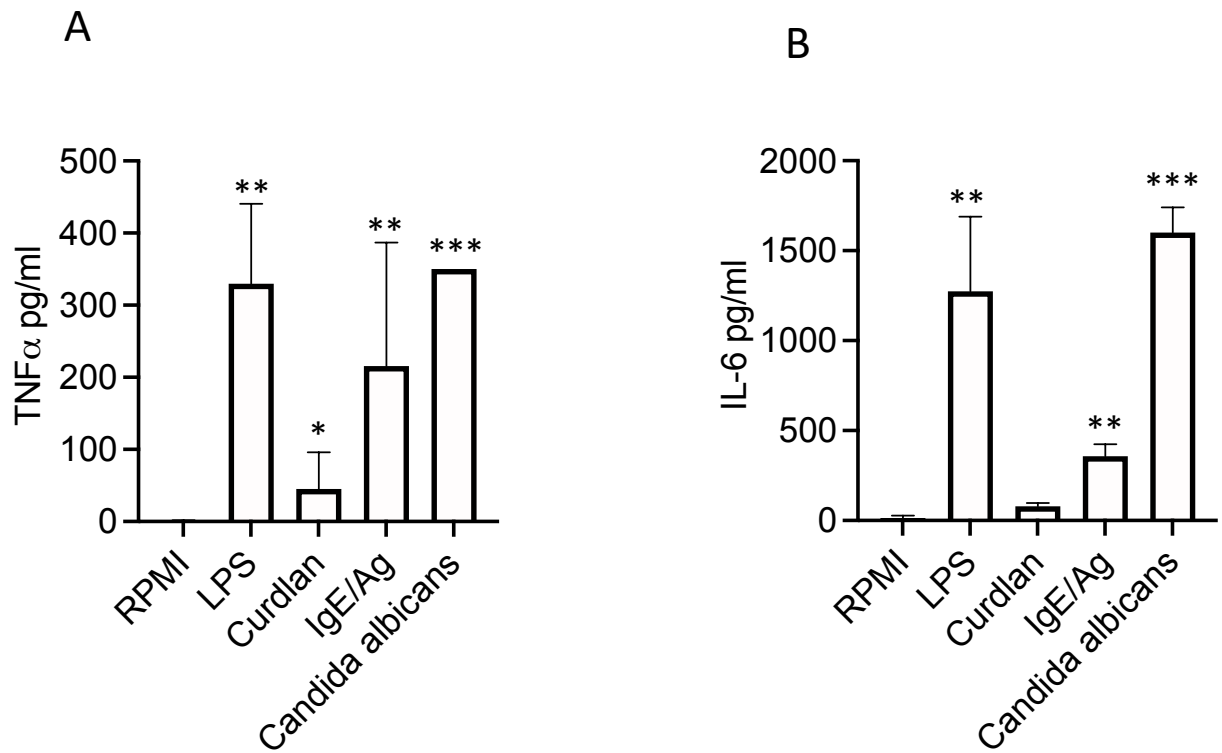

Supplement: DataSheet_1.pdf [file DataSheet_1.pdf]
