# Supplementary material for: LPS Guides Distinct Patterns of Training and Tolerance in Mast Cells
Source: PubMed Central journal article supplement (PMC8891506; doi:10.3389/fimmu.2022.835348), 2022-02-17
Supplement: DataSheet_2.pdf [file DataSheet_2.pdf]

# Supplemental Material

## S2. List of the primers used for methylation analysis

| Region                 | Amplification Primer                      | Sequencing primer           |
|------------------------|-------------------------------------------|-----------------------------|
| Region 1 TNF- $\alpha$ | For: TTTTTATATGAGATTATGG (biotinylated)   | S1:CCTTTATAACCCCTTAAAAAAAAA |
|                        | Rev: ACTTCTACTAACTAECTATAC                | S2: ACTTCTACTAACTAECTATACAA |
| Region 2 TNF- $\alpha$ | For: GAGGGAGAATAGAAATTTAGAA               | S1: AGGTTTTGTTTTTTTATTATTG  |
|                        | Rev: TAAAATTCTAAAACCCCCCAT (biotinylated) | S2: ATTATGAGTATAGAAAGTATGAT |

| Target                                   | Primer name                     | Primer sequence               | Application                                  | Note                                                                                                                                        |
|------------------------------------------|---------------------------------|-------------------------------|----------------------------------------------|---------------------------------------------------------------------------------------------------------------------------------------------|
| TNF- $\alpha$<br>chr17:35201591-35202581 | mTNFpromREG1_For (biotinylated) | TTTTTATATGAGATTATGG           | Region1 PCR amplification for pyrosequencing | The region analysed was divided in two fragments (Region 1 and 2) and each fragment was sequenced in two different round (sequence 1 and 2) |
|                                          | mTNFpromREG1_Rev                | ACTTCTACTAACTAECTATAC         |                                              |                                                                                                                                             |
|                                          | Region1 Sequence1               | CCTTTATAACCCCTTAAAAAAAAA      | Sequencing primer for Region 1               |                                                                                                                                             |
|                                          | region1 Sequence2               | ACTTCTACTAACTAECTATACAA       |                                              |                                                                                                                                             |
|                                          | mTNFpromREG2_For                | GAGGGAGAATAGAAATTTAGAA        | Region2 PCR amplification for pyrosequencing |                                                                                                                                             |
|                                          | mTNFpromREG2_Rev (biotinylated) | TAAAATTCTAAAACCCCCCAT         |                                              |                                                                                                                                             |
|                                          | Region2 Sequence1               | AGGTTTTGTTTTTTTATTATTG        | Sequencing primer for Region 1               |                                                                                                                                             |
|                                          | Region2 Sequence2               | ATTATGAGTATAGAAAGTATGAT       |                                              |                                                                                                                                             |
| SOCS3<br>chr11:117967652-117968576       | meth_SOCS3_for1                 | GTTGGGTTTGAGATACGGTT          | Primer for methylated fragments              |                                                                                                                                             |
|                                          | meth_SOCS3_rev1                 | CGCGACGATAACTACAACCTCTC       |                                              |                                                                                                                                             |
|                                          | unMeth_SOCS3_for1               | GGTGGTTGGTTTGAGATATG          | Primer for unmethylated fragments            |                                                                                                                                             |
|                                          | unMeth_SOCS3_rev1               | AATCTACACAACAATAACTACAACCTCTC |                                              |                                                                                                                                             |
